# Supplementary material for: Abnormal Lipoproteins Trigger Oxidative Stress-Mediated Apoptosis of Renal Cells in LCAT Deficiency
Source: MDPI journal article supplement (doi:10.3390/antiox12081498), 2023-07-27
Supplement: s1 [file s1]

## SUPPLEMENTAL MATERIAL

# Abnormal Lipoproteins Trigger Oxidative Stress-Mediated Apoptosis of Renal Cells in LCAT Deficiency

Monica Gomaschi <sup>1</sup>, Marta Turri <sup>1</sup>, Arianna Strazzella <sup>1</sup>, Marie Lhomme <sup>2</sup>, Chiara Pavanello <sup>1</sup>, Wilfried Le Goff <sup>3</sup>, Anatol Kontush <sup>3</sup>, Laura Calabresi <sup>1,\*</sup> and Alice Ossoli <sup>1</sup>

<sup>1</sup> Center E. Grossi Paoletti, Department of Pharmacological and Biomolecular Sciences “Rodolfo Paoletti”, Università degli Studi di Milano, Via Balzaretti 9, 20133 Milan, Italy

<sup>2</sup> Foundation for Innovation in Cardiometabolism and Nutrition (ANR-10-IAHU-05), IHU ICAN (ICAN OMICS and ICAN I/O), 75013 Paris, France

<sup>3</sup> National Institute for Health and Medical Research (INSERM), UMRS 1166 ICAN, Faculty of Medicine Pitié-Salpêtrière, Sorbonne University, 75013 Paris, France

**Supplementary Table S1. Conditions of mass spectrometry analysis**

| Sphingolipids' subclasses         | N of assayed species | N of quantified species (>LOQ) | ISTD                | Parent ion         | MS Experiment |
|-----------------------------------|----------------------|--------------------------------|---------------------|--------------------|---------------|
| Sphingomyelin (SM)                | 16                   | 16                             | SM (d18:1/18:1-d9)  | [M+H] <sup>+</sup> | PIS 184m/z    |
| Dihydrosphingomyelin (DHSM)       | 9                    | 8                              |                     |                    |               |
| Ceramide (Cer d18:1;O2)           | 14                   | 13                             | Cer (d18:1-d7/24:0) | [M+H] <sup>+</sup> | PIS 264m/z    |
| Sphingadienines (Cer 18:2;O2)     | 11                   | 10                             |                     |                    | PIS 262m/z    |
| Dihydroceramide (Cer 18:0;O2 DHC) | 11                   | 10                             |                     | [M+H] <sup>+</sup> | PIS 266m/z    |

LOQ: limit of quantitation, ISTD: internal standard, PIS: product Ion Scan

**Supplementary Table S2. Primers for real-time PCR**

| Target         | Primer forward                  | Primer reverse                |
|----------------|---------------------------------|-------------------------------|
| $\beta$ -actin | CTG GAC TTC GAG CAA GAG ATG     | CCA TGC CCA GGA AGG AAG       |
| Podocin        | CAT GAG ATC GTG ACC AAA GAC     | GAG ACG CTT CAT AGT GGT TTG   |
| Synaptopodin   | AAG TCA CAT CCA GCT CCT TC      | CTT CTC CGT GAG GCT AGT G     |
| IL-6           | AAC CTG AAC CTT CCA AAG ATG G   | TCT GGC TTG TTC CTC ACT ACT   |
| VCAM-1         | CCA CAG TAA GGC AGG CTG TAA AAG | CGC TGG AAC AGG TCA TGG TCA C |

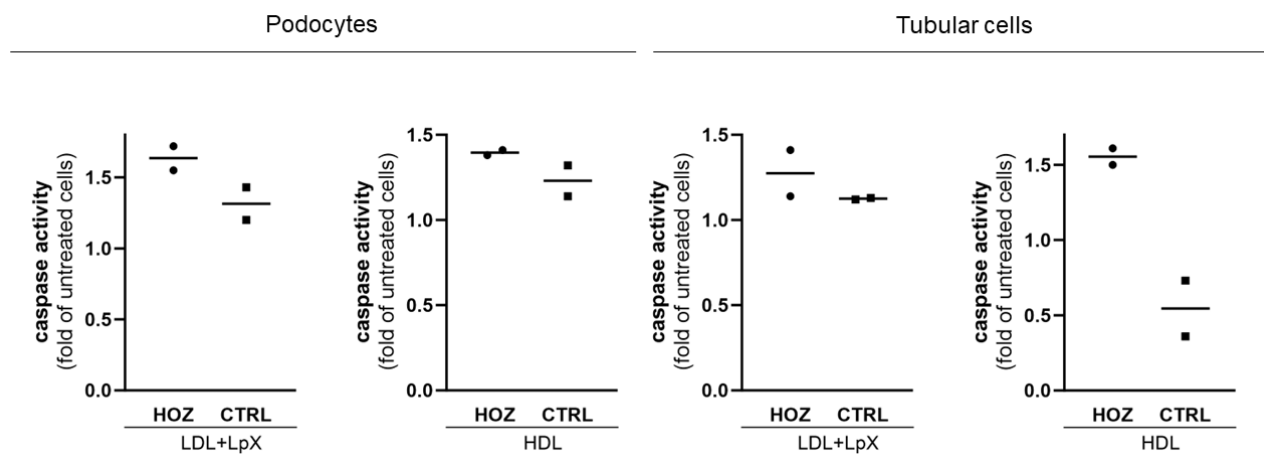

**Supplementary Figure S1.** Effect of isolated lipoproteins on apoptosis of renal cells. Caspase 3/7 activity induced by incubation of podocytes and tubular cells with LDL+LpX or HDL isolated from HOZ (n=2) and CTRL (n=2). HOZ, homozygous carriers; CTRL, controls.

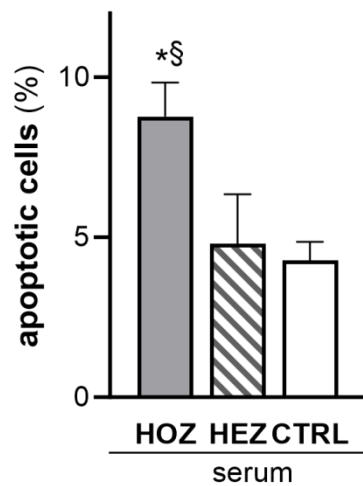

**Supplementary Figure S2.** Evaluation of apoptosis of podocytes by annexin V staining. The percentage of apoptotic cells (positive for annexin V staining) on total cells is reported as mean $\pm$ SEM. Data were analyzed by One Way ANOVA  $P=0.005$ , §  $P$ (two-tailed)  $<0.05$  vs HEZ, \* $P$ (two-tailed)  $<0.05$  vs ctrl. HOZ (N=3), HEZ (N=3) and CTRL (N=3). HOZ, homozygous carriers; HEZ, heterozygous carriers; CTRL, controls.
